# Supplementary material
Source: Royal Society of Chemistry journal article supplement (doi:10.1039/d6cc01036a)
Supplement: d6cc01036a1.pdf [file d6cc01036a1.pdf]

## Supplemental Information

### **Boosting Photocatalytic Hydrogen Evolution by Ultrafast Charge Transfer in a ZnS-CdS Z-Scheme Heterojunction with an Intercalated Co<sub>9</sub>S<sub>8</sub> Layer**

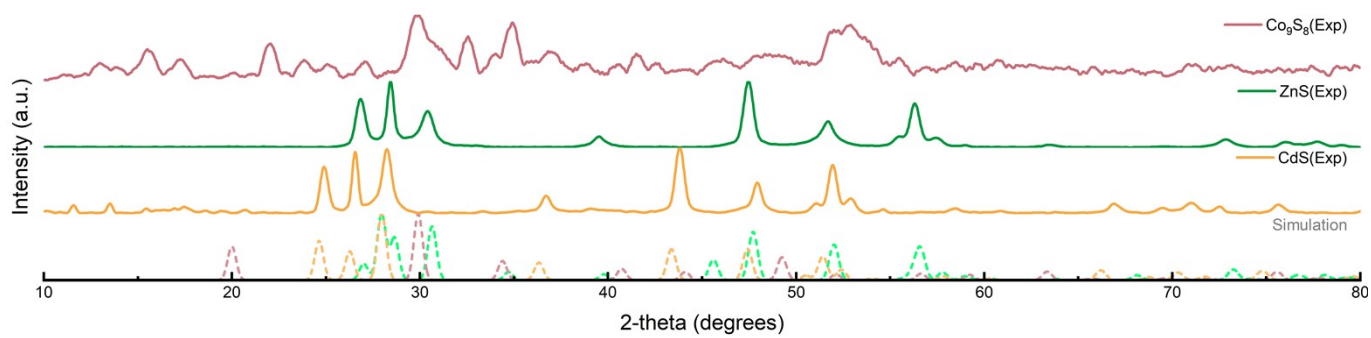

**Supplementary Fig. S1. Crystallographic simulation and analyses: XRD analyse synthesized  $\text{Co}_9\text{S}_8$ , ZnS and CdS.**

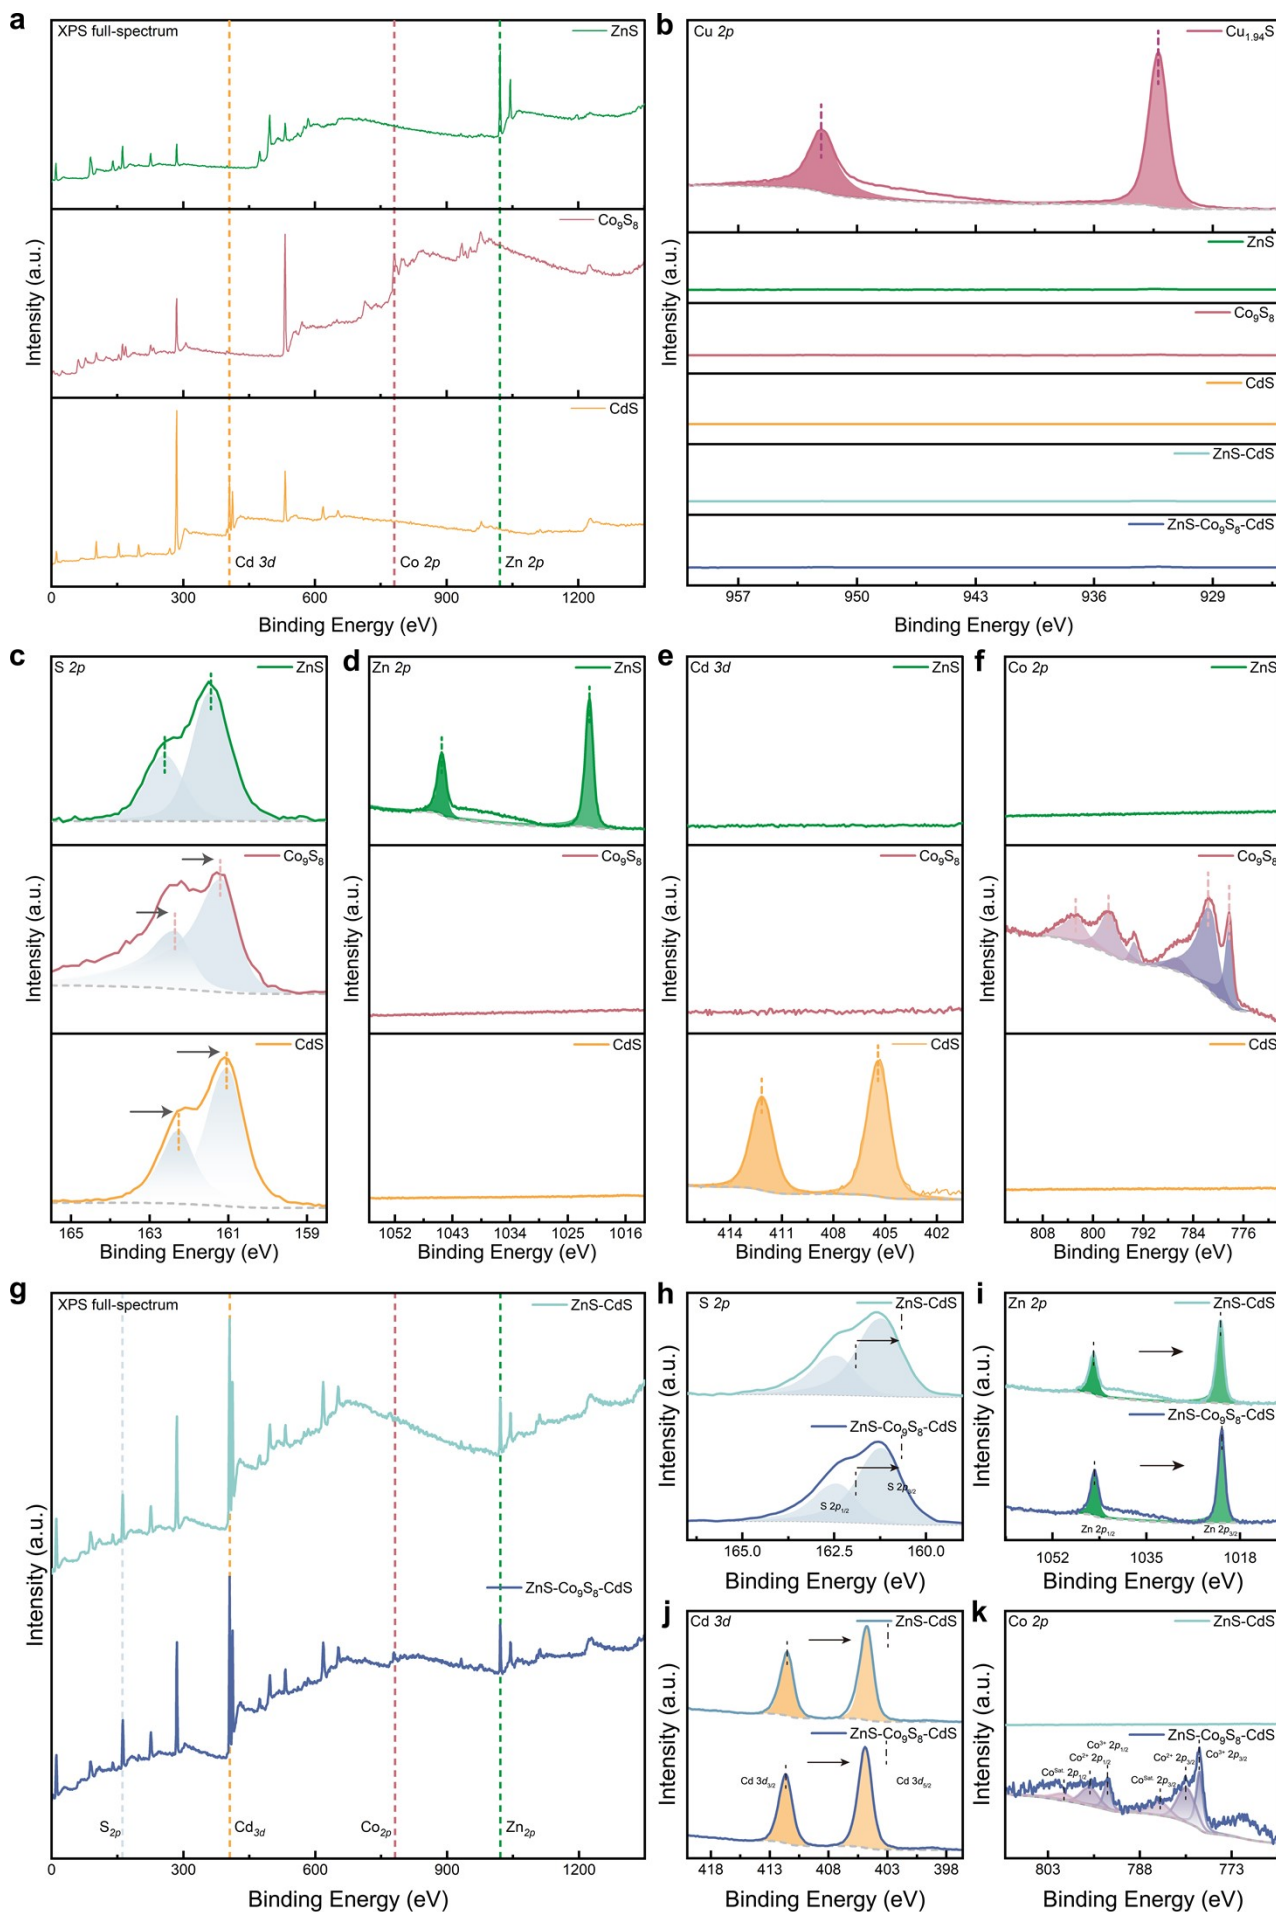

**Supplementary Fig. S2. Chemical structure analysis:** The XPS spectra of survey and high-resolution spectra of ZnS, Co<sub>9</sub>S<sub>8</sub>, CdS (a) full spectra (b) Cu 2p, (c) S 2p, (d) Zn 2p, (e) Cd 3d, and (f) Co 2p. The XPS spectra of survey and high-resolution spectra of ZnS-CdS & ZnS-Co<sub>9</sub>S<sub>8</sub>-CdS (g) full spectra (h) S 2p, (i) Zn 2p, (j) Cd 3d and (k) Co 2p.

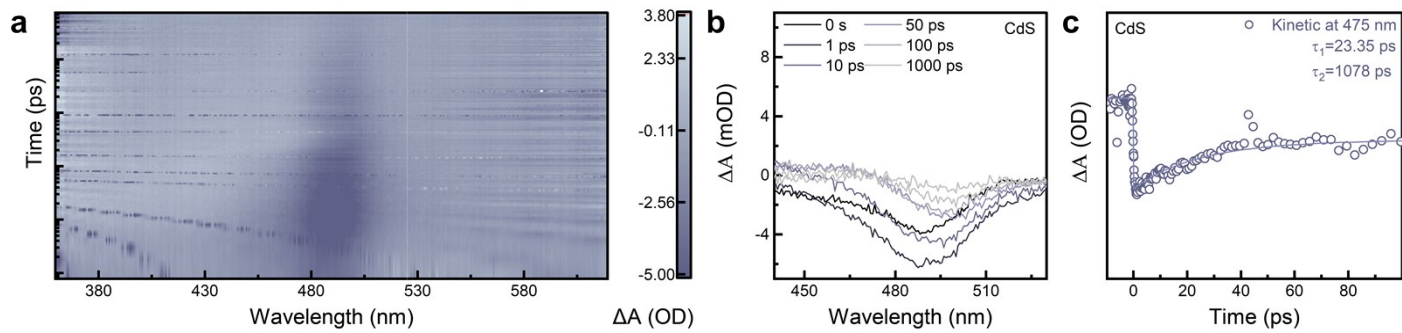

**Supplementary Fig. S3. Photogenerated carrier dynamics analysis:** (a) 2D pseudo colour fs-TA spectra for CdS. (b) fs-TA spectra of CdS. (c) Corresponding normalized fitted transient absorption kinetics of CdS probed at 325 nm with a delay time within 100 ps.

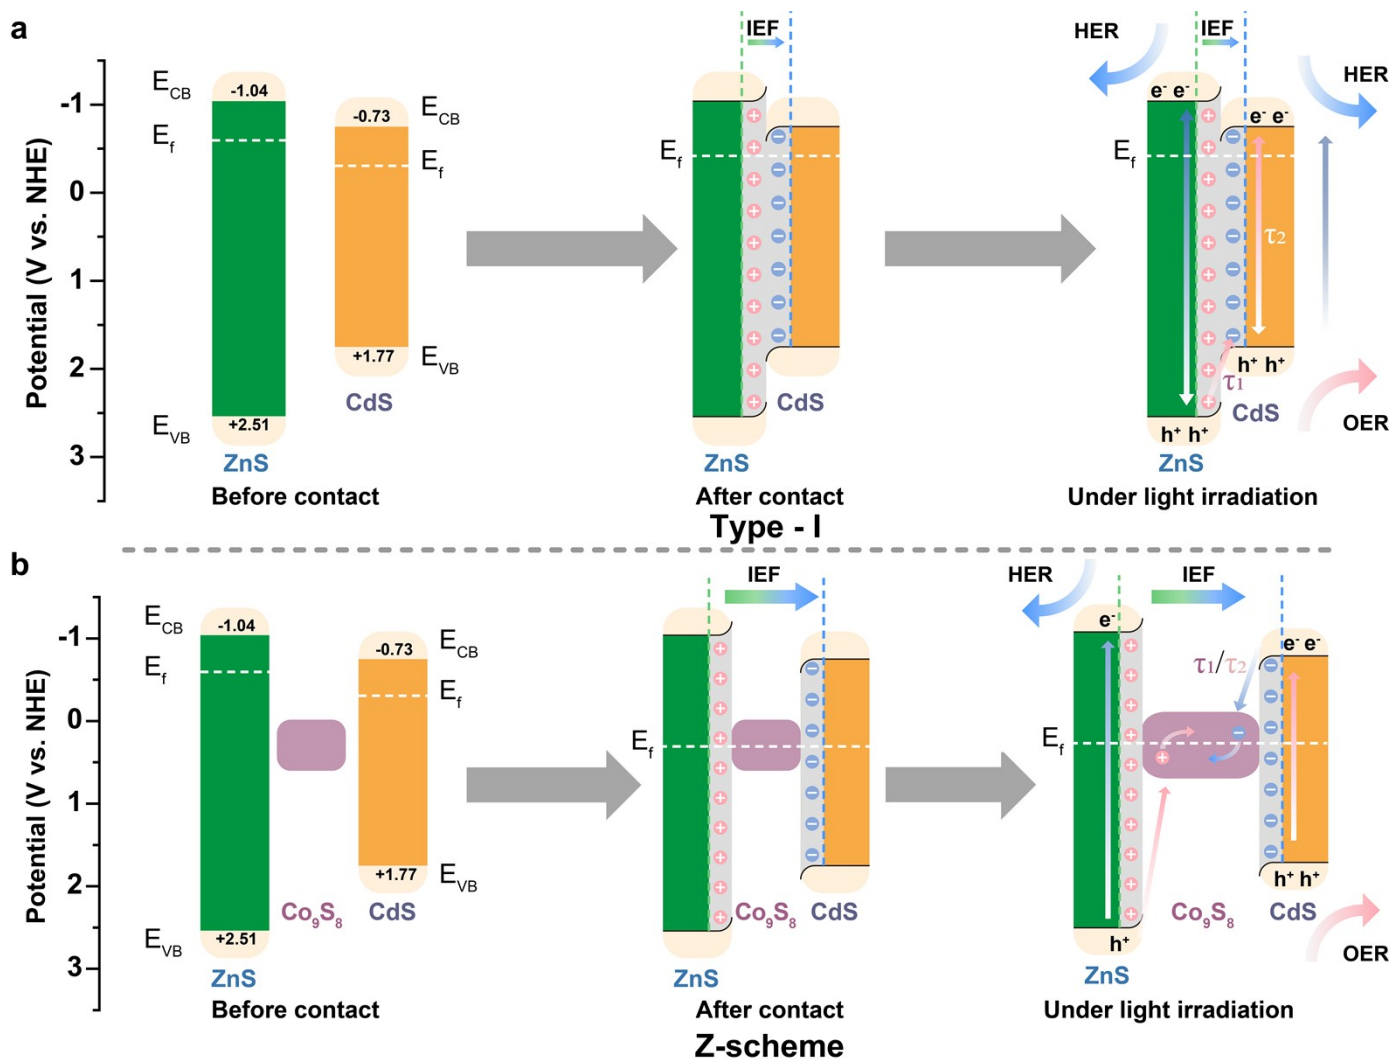

**Supplementary Fig. S4. Band structure and charge carrier dynamics analysis:** (a) Schematic illustration of the band structures of ZnS and CdS (left), interfacial charge transfer and the formation of an IEF upon hybridization (middle), and ZnS-CdS Type-I heterojunction under light irradiation (right). (b) Schematic illustration of the band structures of ZnS,  $Co_9S_8$  and CdS (left), interfacial charge transfer and the formation of an IEF upon hybridization (middle), and ZnS- $Co_9S_8$ -CdS Z-Scheme heterojunction under light irradiation (right).

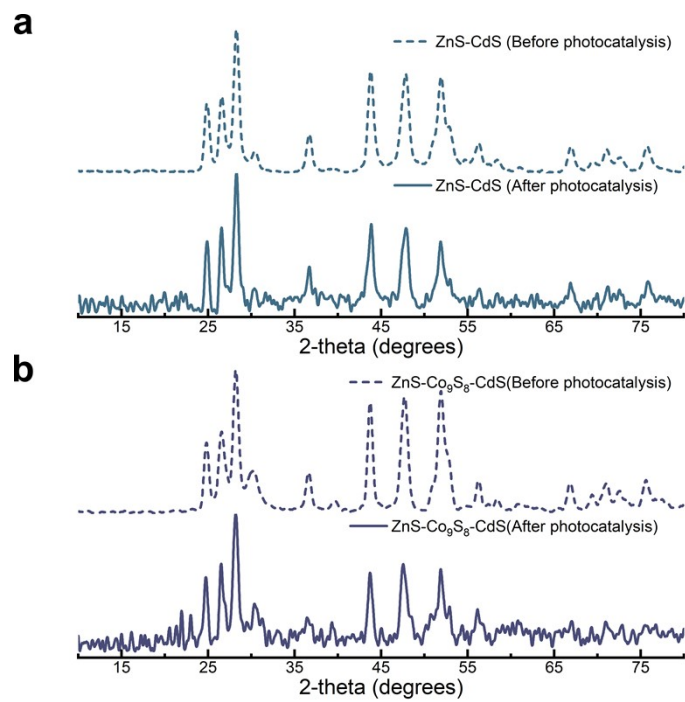

**Supplementary Fig. S5 Photocatalyst durability analysis:** XRD analysis of before and after photocatalysis for (a) ZnS-CdS and (b) ZnS-Co<sub>9</sub>S<sub>8</sub>-CdS.

## 2. Experiment

### 2.1 Materials

All chemicals were of analytical grade and used as received without further purification. Cadmium chloride ( $\text{CdCl}_2$ ), copper (II) acetylacetonate ( $\text{Cu}(\text{acac})_2$ ), zinc chloride ( $\text{ZnCl}_2$ ), and cobalt (II) chloride ( $\text{CoCl}_2$ ) were purchased from Aladdin Scientific Corp. (Shanghai, China). Solvents including 1-octadecene (ODE), oleylamine (OLAm, 80-90%), and trioctylphosphine (TOP, 97%) were also obtained from Aladdin. Sodium sulphite ( $\text{Na}_2\text{SO}_3$ ) and sodium sulphide nonahydrate ( $\text{Na}_2\text{S}\cdot 9\text{H}_2\text{O}$ ) were supplied by Sinopharm Chemical Reagent Co. Ltd.

### 2.2 Synthesis of $\text{Cu}_{1.94}\text{S}$ Rod

$\text{Cu}_{1.94}\text{S}$  nanorods were synthesized as the cation exchange template via a modified heating-up method [8]. Briefly, copper (II) acetylacetonate and trioctylphosphine oxide (TOPO) were dissolved in ODE under argon. After degassing, tert-dodecyl mercaptan (t-DDT) was injected at 80 °C, and the temperature was raised to 180 °C for 30 minutes. The resulting nanorods were purified by repeated centrifugation with hexane/ethanol mixtures.

### 2.3 Cation exchange reaction of ZnS, CdS, ZnS-CdS and ZnS- $\text{Co}_9\text{S}_8$ -CdS

The ZnS-CdS and ZnS- $\text{Co}_9\text{S}_8$ -CdS heterostructures were synthesized through a controlled sequential cation exchange process [9]. First, precursor solutions containing metal-oleylamine complexes ( $\text{M}^{2+} = \text{Zn}^{2+}, \text{Co}^{2+}, \text{or Cd}^{2+}$ ) were prepared in ODE/OLAm mixtures at 200 °C under inert atmosphere.

**For ZnS-CdS:** A dispersion of  $\text{Cu}_{1.94}\text{S}$  nanorods in TOP was injected into a hot solution containing a precise amount of  $\text{Zn}^{2+}$  precursor. After purification, the intermediate product underwent a second exchange with a  $\text{Cd}^{2+}$  precursor solution to yield the binary heterojunction.

**For ZnS- $\text{Co}_9\text{S}_8$ -CdS:** The ternary heterostructure was achieved by a sequential three-step exchange. The template nanorods were reacted successively with  $\text{Zn}^{2+}$ ,  $\text{Co}^{2+}$ , and finally  $\text{Cd}^{2+}$  precursor solutions. The molar ratio of the precursors was precisely controlled (e.g., 1/3 stoichiometry relative to the template for each cation) to achieve the targeted segmented architecture. Each exchange step was conducted at 120 °C for 30 minutes, with intermediate purification cycles.

**Sample purification procedure:** After synthesis, all products were isolated through addition of a 3:1 n-hexane:ethanol mixture, followed by subsequent centrifugation and resuspension in n-hexane. The centrifugation / resuspension process was repeated twice before the final product was suspended in n-hexane for characterization. The centrifugation set was 8500 rpm@5 min. Finally, the samples were dried under vacuum at 60 °C for 12 hours to obtain the final powder materials.

### 2.4 Structural and Optical Characterization

A suite of complementary analytical techniques was employed to investigate the morphology, crystallinity, and elemental composition of the synthesized  $\text{Cu}_{1.94}\text{S}$  nanorods and their derivative heterostructures. Transmission electron microscopy (TEM) and high-resolution TEM (HRTEM) analyses were performed on an FEI Titan G2 60-300 field-emission microscope operating at an accelerating voltage of 300 kV. Elemental mapping was achieved via high-angle annular dark-field scanning TEM (HAADF-STEM) coupled with energy-dispersive X-ray spectroscopy (EDS), with the beam current carefully adjusted between 0.15 and 0.75 nA during acquisition. For TEM observations, samples were prepared by drop-casting a dilute dispersion of nanoparticles in n-hexane onto carbon-coated molybdenum grids. Phase identification was carried out by powder X-ray diffraction (XRD) using a Rigaku MiniFlex600 diffractometer with Cu  $\text{K}\alpha$  radiation ( $\lambda = 1.54 \text{ \AA}$ ), scanning the  $2\theta$  range from 10° to 80°. Surface chemical states were probed by X-ray photoelectron spectroscopy (XPS) on a Thermo Scientific ESCALAB Xi+ system equipped with a monochromatic Al  $\text{K}\alpha$  source; all binding energies were referenced to the adventitious carbon C 1s peak at 284.8 eV. Optical absorption properties across the ultraviolet-visible-near infrared (UV-vis-NIR) range were assessed in diffuse reflectance mode using a Shimadzu UV-1800 spectrophotometer.

### 2.5 Photoelectrochemical (PEC) Analysis

The photoelectrochemical behaviour, indicative of charge carrier dynamics, was evaluated using a standard three-electrode configuration connected to a Metrohm Autolab PGSTAT302N potentiostat integrated with a  $\mu$ Stat-i 400 impedance analyser. Working electrodes were prepared by spin-coating an aqueous dispersion of the photocatalyst ( $1 \text{ mg mL}^{-1}$ ) onto fluorine-doped tin oxide (FTO) glass substrates, followed by annealing at  $300 \text{ }^\circ\text{C}$  under a nitrogen atmosphere. The electrochemical cell consisted of the photocatalyst/FTO working electrode, a platinum foil counter electrode, and an Ag/AgCl reference electrode immersed in a  $0.1 \text{ M Na}_2\text{SO}_4$  electrolyte solution. Transient photocurrent responses were measured under chopped illumination from a simulated solar source (AM 1.5G,  $100 \text{ mW cm}^{-2}$ ) while applying a constant bias of  $0.4 \text{ V}$  versus Ag/AgCl. Electrochemical impedance spectroscopy (EIS) was conducted in the dark over a frequency range of  $10^5$  to  $10^{-1} \text{ Hz}$  with an AC amplitude of  $10 \text{ mV}$ . Mott-Schottky analysis was performed at a fixed frequency of  $10^3 \text{ Hz}$  under dark conditions to estimate the flat-band potential.

## ***2.6 Assessment of Photocatalytic Hydrogen Evolution***

Photocatalytic hydrogen production activity was quantified using a closed-gas circulation system (Labsolar-6A, Perfectlight) with online gas analysis performed by a gas chromatograph (GC 9790II, Fuli) equipped with a thermal conductivity detector. To enhance the hydrophilicity of the as-synthesized nanocrystals, a ligand exchange procedure was implemented: the catalyst was treated with formamide containing  $3 \text{ vol}\%$  3-mercaptopropionic acid (MPA) under sonication and subsequent stirring, followed by thorough washing with ethanol and deionized water. In a typical photocatalytic test,  $10 \text{ mg}$  of the surface-modified catalyst was dispersed in  $100 \text{ mL}$  of an aqueous solution containing  $0.1 \text{ M Na}_2\text{SO}_3$  and  $0.1 \text{ M Na}_2\text{S}\cdot 9\text{H}_2\text{O}$  as sacrificial agents. The reactor was sealed, purged with argon to remove dissolved air, and the temperature was maintained at  $10.0 \pm 0.5 \text{ }^\circ\text{C}$ . The suspension was irradiated with simulated sunlight from a  $300 \text{ W}$  xenon lamp (PLS-SXE300D, Perfectlight) fitted with an AM 1.5G filter. Evolved hydrogen was monitored at regular intervals. Catalyst stability was evaluated through consecutive recycling experiments, wherein the system was evacuated and replenished with fresh sacrificial solution after each run without replacing the catalyst.

## ***2.7 Femtosecond Transient Absorption measurements***

Femtosecond transient absorption spectroscopy was utilized to probe ultrafast charge carrier dynamics. The experiments were conducted with a commercial Ti:sapphire regenerative amplifier system (Spectra-Physics Spitfire Ace) delivering  $35 \text{ fs}$  pulses at  $800 \text{ nm}$  with a  $1 \text{ kHz}$  repetition rate. A pump pulse at  $325/650 \text{ nm}$  was generated via optical parametric amplification, and its power was calibrated to  $0.82 \text{ mW}$  at the sample position. A white-light continuum probe beam (spanning  $200\text{--}1600 \text{ nm}$ ) was produced by focusing a portion of the fundamental beam onto a translating sapphire crystal. Differential absorption ( $\Delta A$ ) signals were detected using a spectrometer (Andor SR-500i) synchronized with CMOS and InGaAs array detectors. The pump beam was focused on a spot size of approximately  $100 \text{ }\mu\text{m}$  on the sample cell. All measurements were performed on nanoparticle dispersions in n-hexane to minimize potential solvent interference.

**Supplementary Table S1.** Information of Chemicals used in synthesis and experiments.

| Chemicals                   | CAS No.    | Purity | Formula                                                            | Manufacturer                        | Cat. No.  |
|-----------------------------|------------|--------|--------------------------------------------------------------------|-------------------------------------|-----------|
| Copper acetylacetonate      | 13395-16-9 | ≥97%   | Cu(acac) <sub>2</sub>                                              | Aladdin Scientific Corp.            | C109323   |
| Zinc chloride               | 7646-85-7  | ≥98%   | ZnCl <sub>2</sub>                                                  | Aladdin Scientific Corp.            | Z112526   |
| Cobalt (II) chloride        | 7646-79-9  | 99.7%  | CoCl <sub>2</sub>                                                  | Aladdin Scientific Corp.            | C106772   |
| Cadmium chloride            | 10108-64-2 | 99.99% | CdCl <sub>2</sub>                                                  | Aladdin Scientific Corp.            | C116344   |
| 1-Octadecene                | 112-88-9   | >90%   | C <sub>18</sub> H <sub>36</sub>                                    | Aladdin Scientific Corp.            | O109487   |
| Oleylamine                  | 112-90-3   | 80-90% | C <sub>18</sub> H <sub>37</sub> N                                  | Aladdin Scientific Corp.            | O106967   |
| Trioctylphosphine           | 4731-53-7  | 90%    | C <sub>24</sub> H <sub>51</sub> P                                  | Aladdin Scientific Corp.            | T106625   |
| Trioctylphosphine oxide     | 78-50-2    | ≥98%   | [CH <sub>3</sub> (CH <sub>2</sub> ) <sub>7</sub> ] <sub>3</sub> PO | Aladdin Scientific Corp.            | T106624   |
| <i>Tert</i> -dodecanethiol  | 25103-58-6 | 98%    | C <sub>12</sub> H <sub>26</sub> S                                  | Aladdin Scientific Corp.            | D106952   |
| 3-Mercaptopropionic acid    | 107-96-0   | 98%    | C <sub>3</sub> H <sub>6</sub> O <sub>2</sub> S                     | Aladdin Scientific Corp.            | M103035   |
| Formamide                   | 75-12-7    | 99%    | CH <sub>3</sub> NO                                                 | Aladdin Scientific Corp.            | F103361   |
| Sodium sulphite             | 7757-83-7  | 98%    | Na <sub>2</sub> SO <sub>3</sub>                                    | Aladdin Scientific Corp.            | S112300   |
| Sodium sulphide nonahydrate | 1313-84-4  | ≥98%   | Na <sub>2</sub> S·9H <sub>2</sub> O                                | Aladdin Scientific Corp.            | S299093   |
| Absolute ethanol            | 64-17-5    | ≥99.8% | CH <sub>3</sub> CH <sub>2</sub> OH                                 | Sinopharm Chemical Reagent Co. Ltd. | 10009259  |
| Hexane                      | 110-54-3   | ≥97.0% | CH <sub>3</sub> (CH <sub>2</sub> ) <sub>4</sub> CH <sub>3</sub>    | Sinopharm Chemical Reagent Co. Ltd. | 800686191 |

**Supplementary Table S2.** XPS electron binding energies.

| Sample                                       | BE(eV) | Elements         | Spectral Line     |
|----------------------------------------------|--------|------------------|-------------------|
| Cu <sub>1.94</sub> S NRs                     | 161.5  | S                | 2p <sub>3/2</sub> |
| Cu <sub>1.94</sub> S NRs                     | 162.6  | S                | 2p <sub>1/2</sub> |
| Cu <sub>1.94</sub> S NRs                     | 932.4  | Cu               | 2p <sub>3/2</sub> |
| Cu <sub>1.94</sub> S NRs                     | 952.3  | Cu               | 2p <sub>1/2</sub> |
| ZnS NRs                                      | 161.4  | S                | 2p <sub>3/2</sub> |
| ZnS NRs                                      | 162.7  | S                | 2p <sub>1/2</sub> |
| ZnS NRs                                      | 1021.6 | Zn               | 2p <sub>3/2</sub> |
| ZnS NRs                                      | 1044.7 | Zn               | 2p <sub>1/2</sub> |
| Co <sub>9</sub> S <sub>8</sub> NRs           | 162.6  | S                | 2p <sub>3/2</sub> |
| Co <sub>9</sub> S <sub>8</sub> NRs           | 163.9  | S                | 2p <sub>1/2</sub> |
| Co <sub>9</sub> S <sub>8</sub> NRs           | 778.5  | Co <sup>3+</sup> | 2p <sub>3/2</sub> |
| Co <sub>9</sub> S <sub>8</sub> NRs           | 793.6  | Co <sup>3+</sup> | 2p <sub>1/2</sub> |
| Co <sub>9</sub> S <sub>8</sub> NRs           | 781.1  | Co <sup>2+</sup> | 2p <sub>3/2</sub> |
| Co <sub>9</sub> S <sub>8</sub> NRs           | 797.2  | Co <sup>2+</sup> | 2p <sub>1/2</sub> |
| Co <sub>9</sub> S <sub>8</sub> NRs           | 785.6  | Co Satellite     | 2p <sub>3/2</sub> |
| Co <sub>9</sub> S <sub>8</sub> NRs           | 802.7  | Co Satellite     | 2p <sub>1/2</sub> |
| CdS NRs                                      | 405.4  | Cd               | 3d <sub>5/2</sub> |
| CdS NRs                                      | 412.2  | Cd               | 3d <sub>3/2</sub> |
| CdS NRs                                      | 161.1  | S                | 2p <sub>3/2</sub> |
| CdS NRs                                      | 162.3  | S                | 2p <sub>1/2</sub> |
| ZnS-CdS HNRs                                 | 161.2  | S                | 2p <sub>3/2</sub> |
| ZnS-CdS HNRs                                 | 162.5  | S                | 2p <sub>1/2</sub> |
| ZnS-CdS HNRs                                 | 1021.5 | Zn               | 2p <sub>3/2</sub> |
| ZnS-CdS HNRs                                 | 1044.6 | Zn               | 2p <sub>1/2</sub> |
| ZnS-CdS HNRs                                 | 404.8  | Cd               | 3d <sub>5/2</sub> |
| ZnS-CdS HNRs                                 | 411.5  | Cd               | 3d <sub>3/2</sub> |
| ZnS-Co <sub>9</sub> S <sub>8</sub> -CdS HNRs | 161.2  | S                | 2p <sub>3/2</sub> |
| ZnS-Co <sub>9</sub> S <sub>8</sub> -CdS HNRs | 162.5  | S                | 2p <sub>1/2</sub> |
| ZnS-Co <sub>9</sub> S <sub>8</sub> -CdS HNRs | 1021.3 | Zn               | 2p <sub>3/2</sub> |
| ZnS-Co <sub>9</sub> S <sub>8</sub> -CdS HNRs | 1044.4 | Zn               | 2p <sub>1/2</sub> |
| ZnS-Co <sub>9</sub> S <sub>8</sub> -CdS HNRs | 404.9  | Cd               | 3d <sub>5/2</sub> |
| ZnS-Co <sub>9</sub> S <sub>8</sub> -CdS HNRs | 411.6  | Cd               | 3d <sub>3/2</sub> |
| ZnS-Co <sub>9</sub> S <sub>8</sub> -CdS HNRs | 778.3  | Co <sup>3+</sup> | 2p <sub>3/2</sub> |
| ZnS-Co <sub>9</sub> S <sub>8</sub> -CdS HNRs | 793.3  | Co <sup>3+</sup> | 2p <sub>1/2</sub> |
| ZnS-Co <sub>9</sub> S <sub>8</sub> -CdS HNRs | 780.6  | Co <sup>2+</sup> | 2p <sub>3/2</sub> |
| ZnS-Co <sub>9</sub> S <sub>8</sub> -CdS HNRs | 796.3  | Co <sup>2+</sup> | 2p <sub>1/2</sub> |
| ZnS-Co <sub>9</sub> S <sub>8</sub> -CdS HNRs | 784.9  | Co Satellite     | 2p <sub>3/2</sub> |
| ZnS-Co <sub>9</sub> S <sub>8</sub> -CdS HNRs | 801.0  | Co Satellite     | 2p <sub>1/2</sub> |

**Supplementary Table S3.** Fs-TAS fitting parameters.

| Sample     | $\tau_1$ (ps) | $\tau_2$ (ps) | A <sub>1</sub> | A <sub>2</sub> | Standard Deviation |
|------------|---------------|---------------|----------------|----------------|--------------------|
| CdS@325 nm | 23.35         | 1078          | -0.00325       | -0.00107       | 0.000406           |
| ZC@325 nm  | 16.46         | 775.1         | -0.0159        | -0.00662       | 0.00125            |
| ZCC@325 nm | 0.198         | 1.693         | 0.00515        | -0.00319       | 0.000533           |
| ZCC@650 nm | 1.149         | 54.05         | -0.05873       | -0.1144        | 0.00453            |

$$A(t) = A_1 \exp\left(-\frac{t}{\tau_1}\right) + A_2 \exp\left(-\frac{t}{\tau_2}\right)$$

All fs-TAS signals were fitted using a double-exponential decay function:

$\tau_1$  corresponds to the fast component (~1–10 ps), representing the initial ultrafast charge transfer process<sup>11</sup>.

$\tau_2$  corresponds to the slow component (10–1000 ps), reflecting recombination dynamics influenced by interfacial carrier separation or bulk defects recombination.

A<sub>1</sub> and A<sub>2</sub> are the amplitudes of the corresponding decay components.
